# Supplementary material for: Listening to the Voices of Healthcare Providers Who Involved in a New Birthing Room Design: An Interpretative Phenomenological Analysis Study
Source: Research Square preprint supplement (doi:10.21203/rs.3.rs-4714570/v1), 2025-04-28
Supplement: Supplementary file 1 [file c4619d014e7acea9ad192237.pdf]

## **Exploring HealthCare Providers' perspectives of redesign, the birthing room:**

### **An Interpretative Phenomenological Analysis Study**

The crucial data collection step will commence after King Saud University receives Institutional Review Board (IRB) approval. A study announcement will be posted on bulletin boards at the hospital and sent by email to the target population. Additionally, nurses- midwives, and women will be invited to participate in the study by the word-of-mouth strategy. Permission will be obtained from the study setting, and consent will be obtained from the study participants. Participants will be asked whether they are willing to participate in an interview. Verbal confirmation will be obtained to ensure their understanding of the study topic and procedures, the purpose, and the audio-recorded format. The researcher will conduct a semi-structured individual interview driven by open-ended questions. The 30-60-minute interview will take place in a private, comfortable, quiet room. **Qualitative Research Questions**

- 1) What is your definition of natural, instinctive birth?
- 2) In your opinion, is there a need to redesign the delivery room? Explain more?
- 3) Through your experience, how do you feel the birthing room affects your ability to promote a normal physiological birth?
- 4) What practices will change as result of redesigning delivery rooms?
- 5) What are the requirements for re-implementing childbirth after redesigning the delivery room?
- 6) What is the value of redesigning delivery rooms to respect the presence of a companion with the mother?
- 7) In your view, what is the importance of redesigning the birthing room?
- 8) Discuss the ways how nurses can support normal natural instinctive childbirth?
